# Supplementary material for: Effects of starch sugar by-product on rumen in vitro digestibility, in situ disappearance rate, and milking productivity of the lactating dairy cow
Source: PeerJ. 2022 Feb 22;10:e12998. doi: 10.7717/peerj.12998 (PMC8877396; doi:10.7717/peerj.12998)
Supplement: Supplemental Information 3 — Raw material ingredients, feed formula, in situ disappearance, in vitro digestibility test , and animal test results. [file peerj-10-12998-s003.xlsx]

## Sheet: 1-1.Physical characteristcs
Items	unit	SSBP1	SSBP2	SSBP3	SSBP4	SSBP5	SSBP6	SSBP7	SSBP8	SSBP9	SSBP10
Complex viscosity	Pa/s	7536	8922	21235	9807	18729	18855	15455	11839	7593	14012
Particle size	㎛	394	553	570	673	703	592	667	583	289	547
Density	g/cm3	1.613	1.302	1.202	1.192	1.192	1.322	1.2	1.437	1.425	1.26

## Sheet: 1-2. Chemical characteristics
Item	Unit	SSBP1	SSBP2	SSBP3	SSBP4	SSBP5	SSBP6	SSBP7	SSBP8	SSBP9	SSBP10
Dry matter	%	60.32	63.11	64.55	57.5	55.2	58.89	60.71	65.83	62.88	65.34
Crude protein	%DM	8.88594	13.6112	19.7211	33.4609	13.9312	14.4507	12.9962	10.5271	6.01145	10.6826
Ether extract	%DM	16.5451	27.3491	36.9946	30.2957	26.1775	21.3958	23.5052	20.3858	10.6552	19.2684
Ash	%DM	45.8223	33.4971	22.2928	11.0087	18.0797	33.8597	27.5408	35.2727	57.3155	41.3529
Neutral detergent fiber	%DM	47.9443	34.0992	22.4942	13.1478	33.6413	40.4653	41.0311	33.8903	51.2246	38.8124
Acid detergent fiber	%DM	45.8057	30.4865	19.2409	11.7565	28.9312	27.4919	37.638	28.7103	47.1056	35.7055
Water soluble carbohydrate	%DM	1.70756	9.22199	8.45856	9.63478	15.1812	12.4469	15.7799	8.58271	8.41285	10.1775
Gross energy	Kcal/kg	4549.2	4549.2	5411.31	6005.22	4724.64	3965.02	3999.34	3859.94	2340.97	3628.71

## Sheet: 1-3. Fatty acids
	Fatty acid composition (g/100g fatty acid)
	SSBP1	SSBP2	SSBP3	SSBP4	SSBP5	SSBP6	SSBP7	SSBP8	SSBP9	SSBP10	mean
C8:0	0.04	0.01	0.01	0.03	0.02	0.01	0.01	0.04	0.02	0.01	0.02
C12:0	0.01	0.04	0.04	0.05	0.01	0.01	0.01	0.01	0.02	0.01	0.021
C14:0	0.08	0.08	0.08	0.05	0.1	0.09	0.08	0.11	0.1	0.08	0.085
C16:0	44.52	33.58	34.23	30.52	47.28	45.64	40.24	44.58	43.22	37.26	40.107
C17:0	0.25	0.11	0.23	0.06	0.3	0.28	0.25	0.15	0.15	0.12	0.19
C18:0	3.13	2.62	2.6	2.24	3.22	3.11	3.72	4.23	4.05	3.48	3.24
C20:0	0.35	0.24	0.26	0.19	0.25	0.28	0.27	0.37	0.35	0.3	0.286
C22:0	0.22	0.11	0.05	0.24	0.07	0.08	0.03	0.1	0.11	0.07	0.108
C16:1	0.13	0.11	0.09	0.12	0.14	0.14	0.14	0.28	0.27	0.26	0.168
C17:1	0.22	0.05	0.11	0.13	0.15	0.17	0.14	0.04	0.05	0.04	0.11
C18:1n9	14.68	13.96	12.17	11.9	13.87	16.62	14.27	15.49	14.11	13.06	14.013
C18:2n6	33.45	43.8	43.43	49.26	30.68	29.1	36.81	29.54	31.18	40.48	36.773
C18:3n3	1.38	2.67	3.02	3.33	1.21	0.98	1.67	0.96	1.39	2.12	1.873
C20:1n9	0.21	0.25	0.19	0.01	0.11	0.18	0.05	0.32	0.34	0.27	0.193
C20:2n6	0.04	0.1	0.15	0.07	0.03	0.03	0.03	0.06	0.07	0.04	0.062
C20:3n6	0.03	0.02	0.06	0.02	0.04	0.03	0.03	0.11	0.12	0.07	0.053
C20:3n3	0.02	0.04	0.1	0.02	0.01	0.02	0.01	0.02	0.02	0.01	0.027
C20:4n6	0.23	0.15	0.11	0.05	0.32	0.34	0.3	0.37	0.35	0.28	0.25

## Sheet: 1-4.amino acid
mg/kg	1	2	3	4	5	6	7	8	9	10
Aspartic acid	6334.12	8804.79	12787	19551.6	10292.9	10993.5	7845.14	6922.56	4294.97	6926.82
Glutamic acid	13944.1	16897.8	29029.9	64428.4	23108.3	27895.9	19299.7	17444.8	10350	16560.9
Serine	3719.51	4653.7	7335.18	14764.5	5898.25	7036.62	4906.13	4271.08	2586.8	4338.88
Histidine	1502.38	2151.51	3123.82	5174.49	2325.48	2941.46	1663.11	1533.11	1012.03	1674.47
Glycine	3189.42	4477.8	6323.11	8703.3	5021.93	5439.9	3806.54	3364.46	2085.78	3438.51
Threonine	3009.78	4093.41	5812.86	9887.7	4868.8	5488.74	3905.43	3294.68	2177.68	3622.85
Arginine	3680.82	4806.62	6909.74	8649.67	5438.3	6393.45	4248.09	3991.97	2462.54	3907.56
Alanine	5818.67	7431.87	12054.5	24443.3	9504.92	11082.1	7799.76	6967.97	4091.47	6705.33
Tyrosine	2871.68	3840.49	6205.56	11784.9	4393.28	5546.08	3534.77	3093.96	1939.7	3206.61
Valine	4488.08	6201.65	9443.49	14080.5	7366.82	7598.05	4982.11	4922.15	3056.47	4626.04
Methionine	1814.32	2549.22	4215.43	7037.34	3065.87	3286.21	2114.4	1928.51	1072.82	1658.98
Phenylalanine	4195.39	5316.22	8679.97	17010	6664.76	7932.99	5485.59	4967.52	2954.2	4644.28
Isoleucine	3092.97	4369.21	6797.32	11268.7	5227.15	5572.95	3526.1	3472.64	2132.06	3194.39
Leucine	8922.49	10592.1	18590.3	42006.8	14443.5	17610.6	12081.1	11110.2	6475.08	10313.4
Lysine	1865.43	3417.44	4048.85	4351.52	3249.41	3540.96	1840.5	2001.95	1288.39	1817.28
Proline	6570	7010.32	11270.2	24801.6	9960.5	11504.6	7450.14	6956.57	4398.54	7215.27

## Sheet: 2-1. IN SITU disappearance - DM
Bag name	Bag wt.,g	Sample wt.,g	After dried wt.,g	Dried wt - bag wt., g	Disapperarnce rate, %						Time, h	Disappearance rate, %
D-0-1	1.2633	6.1005	5.3479	4.0846	33.0448				Cow number 1			Mean	SD
D-0-2	1.285	6.0048	5.6333	4.3483	27.5863						0	32.37	4.48602	67.63	41.2527	0.412527	-0.885454
D-0-3	1.2468	5.8182	4.9424	3.6956	36.4821		32.3711		Cow number 2		2	49.1171	4.63537	50.8829	24.5056	0.245056	-1.40627
D-2-1	1.2596	5.8869	4.2405	2.9809	49.3638						4	54.1951	4.39094	45.8049	19.4276	0.194276	-1.63847
D-2-2	1.2219	5.7874	4.1265	2.9046	49.8117						8	56.1	6.29871	43.9	17.5227	0.175227	-1.74167
D-2-3	1.2509	5.1442	4.2529	3.002	41.643	46.9395					16	57.1146	3.24073	42.8854	16.5081	0.165081	-1.80132
D-2-4	1.2665	5.0727	3.9561	2.6896	46.9789						24	63.165	4.53345	36.835	10.4577	0.104577	-2.25783
D-2-5	1.2201	5.1204	3.7113	2.4912	51.3476						48	73.6227	4.13245	26.3773
D-2-6	1.2403	5.2009	3.5517	2.3114	55.5577	51.2947	49.1171
D-4-1	1.2201	5.4483	3.9893	2.7692	49.1731
D-4-2	1.2101	5.3344	3.8971	2.687	49.6288
D-4-3	1.2304	5.5706	3.8255	2.5951	53.4144	50.7388
D-4-4	1.2204	5.4807	3.6892	2.4688	54.9547
D-4-5	1.2106	5.4841	3.3922	2.1816	60.2195
D-4-6	1.2806	5.1042	3.4356	2.155	57.7799	57.6514	54.1951
D-8-1	1.2652	5.4624	3.6427	2.3775	56.4752
D-8-2	1.288	5.0721	3.1589	1.8709	63.1139
D-8-3	1.2511	5.371	3.3513	2.1002	60.8974
D-8-4	1.211	5.1793	3.0402	1.8292	64.6825	61.2922
D-8-5	1.221	5.3536	3.9361	2.7151	49.2846
D-8-6	1.2009	5.3309	3.9679	2.767	48.0951
D-8-7	1.2401	5.5627	3.7735	2.5334	54.4574						Table X. Dry matter disappearance rate at different incubation time and degradation parameters of 당박
D-8-8	1.209	5.202	3.7163	2.5073	51.8012	50.9096	56.1009				Items	Incubation time, h	DM disappearance rate, %	Degradation parameter
D-16-1	1.291	5.2263	3.6572	2.3662	54.7251						당박	0	32.37	a	0.289943	28.9943
D-16-2	1.2882	5.2051	3.5568	2.2686	56.4158							2	49.1171	b	0.446284	44.6284
D-16-3	1.2527	5.1435	3.7671	2.5144	51.115							4	54.1951	c	0.263773	26.3773
D-16-4	1.2858	5.6032	3.4247	2.1389	61.8272							8	56.1
D-16-5	1.2431	5.0771	3.2688	2.0257	60.1012	56.8369						16	57.1146
D-16-6	1.2601	5.1471	3.4945	2.2344	56.5891							24	63.165
D-16-7	1.2101	5.5012	3.545	2.3349	57.5565							48	73.6227
D-16-8	1.2672	5.6018	3.8321	2.5649	54.2129
D-16-9	1.2531	5.1583	3.4129	2.1598	58.1296
D-16-10	1.4108	5.2311	3.4785	2.0677	60.4729	57.3922	57.1146
D-24-1	1.265	5.2345	3.2788	2.0138	61.5283
D-24-2	1.2291	5.0822	3.7313	2.5022	50.7654
D-24-3	1.2506	5.2596	3.2538	2.0032	61.9135
D-24-4	1.1906	5.4368	3.1102	1.9196	64.6925
D-24-5	1.2401	5.1569	3.0758	1.8357	64.403
D-24-6	1.2945	5.1006	2.9683	1.6738	67.1843	61.7478
D-24-7	1.2386	5.1535	2.8537	1.6151	68.6601
D-24-8	1.0857	5.3178	3.0877	2.002	62.3529
D-24-9	1.2269	5.1767	3.0501	1.8232	64.7807
D-24-10	1.2278	5.5641	3.0787	1.8509	66.735
D-24-11	1.2006	5.0306	3.122	1.9214	61.8057
D-24-12	1.22	5.3556	3.1931	1.9731	63.1582	64.5821	63.165
D-48-1	1.302	5.4228	2.3745	1.0725	80.2224
D-48-2	1.2209	5.2218	2.7886	1.5677	69.9778
D-48-3	1.2735	5.0698	2.3791	1.1056	78.1924
D-48-4	1.2984	5.3044	2.4569	1.1585	78.1596
D-48-5	1.2401	5.1331	2.7608	1.5207	70.3746
D-48-6	1.3007	5.0796	2.7899	1.4892	70.6827	74.6016
D-48-7	1.2314	5.2326	2.4735	1.2421	76.2623
D-48-8	1.2016	5.0136	2.7585	1.5569	68.9465
D-48-9	1.2261	5.0428	2.8609	1.6348	67.5815
D-48-10	1.2337	5.5012	2.7104	1.4767	73.1568
D-48-11	1.2439	5.3165	2.5335	1.2896	75.7434
D-48-12	1.2139	5.1073	2.533	1.3191	74.1723	72.6438	73.6227
	0	2	4	8	16	24	48
당박	32.3711	49.1171	54.1951	56.1009	57.1146	63.165	73.6227

## Sheet: 2-2. IN SITU disappearance - CP
D	10.22
D 0	16.556	16.556				CPintake	INSITUDMD	RESIDUE	CP	CP in residue		CPD
1-D-2	20.2				D0	13	32.37	67.63	0.16556	11.1968	0.861294	13.8706		86.1294	29.6617	0.296617	-1.21531	0
2-D-2	20.69	20.445			D2	13	49.1171	50.8829	0.20445	10.403	0.800231	19.9769		80.0231	23.5554	0.235554	-1.44582	2
1-D-4	21.22				D4	13	54.1951	45.8049	0.21955	10.0565	0.773575	22.6425		77.3575	20.8898	0.208898	-1.56591	4
2-D-4	22.69	21.955			D8	13	56.1	43.9	0.22775	9.99822	0.769094	23.0906		76.9094	20.4417	0.204417	-1.58759	8
1-D-8	22.76				D16	13	57.1146	42.8854	0.22395	9.6042	0.738784	26.1216		73.8784	17.4107	0.174107	-1.74809	24
2-D-8	22.79	22.775			D24	13	63.165	36.835	0.25365	9.34321	0.718708	28.1292		71.8708	15.4031	0.154031	-1.8706	48
1-D-16	22.45				D48	13	73.6227	26.3773	0.2783	7.3408	0.564677	43.5323		56.4677
2-D-16	22.34	22.395
1-D-24	24.89
2-D-24	25.84	25.365
1-D-48	28.01
2-D-48	27.65	27.83
					intake	100		a	0.119224	11.9224
					D	13		b	0.316099	31.6099
								c	0.564677	56.4677
					CPD	SSBP
					0	13.8686
					2	19.9769
					4	22.6425
					8	23.086
					16	26.1216
					24	28.1292
					48	43.5323

## Sheet: 3-1. Table 2 fomular
	Table 2:
	Ingredients and nutritional composition of different level of starch sugar by-product substrate on ruminal in vitro digestibility
		SSB level (%DM)
	Items	0	2	4	6	8
	Ingredients (%DM)
	Timothy	30	30	30	30	30
	Beet pulp	10	10	10	10	10
	Corn	40	38.2	36.4	34.6	32.8
	Starch sugar by-product	0	2	4	6	8
	Soybean meal	20	19.8	19.6	19.4	19.2
	Chemical composition
	CP (%DM)	16.82	16.82	16.82	16.82	16.82
	EE (%DM)	2.78	3.15	3.52	3.89	4.26
	NDF (%DM)	55.72	55.45	55.18	54.92	54.65
	ADF (%DM)	25.61	26.08	26.56	27.03	27.51
	Ash (%DM)	4.99	5.48	5.98	6.48	6.97
	GE (kcal/kg)	4438	4428	4418	4408	4399
	SSB, starch sugar by-product; CP, crude protein; EE, ether extract; NDF, neutral detergent fiber; ADF, acid detergent fiber; GE, gross energy.

## Sheet: 3-2. in vitro digestibility
Ingredient	DM	ASH	CP	EE	ADF	NDF	NFC	ITEM	UNIT	CON	SSBP2%	SSBP4%	SSBP6%	SSBP8%			CP	EE	NDF	ADF	ASH	GE (kcal/kg)
알팔파펠렛	92.23	10.76	13.615	0.85	40.725	60.775	14	Timothy	%	30	30	30	30	30		Timothy	7.05	0.77	77.66	51.73	7.14	4347
톨페스큐	90.54	7.41	4.265	0.53	43.18	70.115	17.68	Beet pulp	%	10	10	10	10	10		Beet pulp	10.08	0.3	60.98	26.47	5.3	4060.38
티모시	92.23	7.14	7.045	0.77	51.725	77.655	7.39	Corn	%	40	38.2	36.4	34.6	32.8		Corn	8.74	5.3	58.96	14.45	2.24	4466.42
라이그라스	90.71	6.48	4.18	0.41	52.47	80.89	8.04	SSBP	%	0	2	4	6	8		SSBP	13	23.51	41.03	37.64	27.54	3999
한우백년전기	89.68	6.08	16.36	3.485	25.085	57.895	16.18	Soybean meal	%	20	19.8	19.6	19.4	19.2		Soybean meal	51	2	13.7	8.3	7.1	4705.26
한우백년육성	90.4	9.4	16.165	3.42	22.795	54.37	16.645			100	100	100	100	100
한우백년3호	89.84	7.3	14.45	3.775	18.44	48.92	25.555										CP	EE	NDF	ADF	ASH	GE (kcal/kg)
한우백년후기	89.29	5.71	12.14	3.295	23.6	60.16	18.695									CON	16.819	2.781	55.72	25.606	4.988	4437.76
프로틴	89.44	8.87	39.57	1.025	14.685	24.845	25.69
맥주박	24.97	4.51	22.085	7.6	28.795	72.635	-6.83									SSBP2%	16.8197	3.1518	55.4519	26.0821	5.48428	4427.93
비트펄프	89.09	5.3	10.08	0.295	26.47	60.98	23.345									Differ	0.00068	0.3708	-0.26808	0.4761	0.49628	-9.82606
파옥쇄	88.85	2.24	8.74	5.3	14.445	58.96	24.76									SSBP4%	16.8204	3.5226	55.1838	26.5582	5.98056	4418.1
아몬드피	91.96	6.7	4.62		42.19	59.9	28.78									Differ	0.00136	0.7416	-0.53616	0.9522	0.99256	-19.6521
파인애플 부산물	9.2	4.9	5.72	1.19	17.65	39.36	48.83									SSBP6%	16.821	3.8934	54.9158	27.0343	6.47684	4408.28
당박	60.71	27.54	13	23.51	37.64	41.03	-5.08									Differ	0.00204	1.1124	-0.80424	1.4283	1.48884	-29.4782
																SSBP8%	16.8217	4.2642	54.6477	27.5104	6.97312	4398.45
																Differ	0.00272	1.4832	-1.07232	1.9044	1.98512	-39.3042
									Table. TMR formula and chemical composition of control and replacement level of SSBP
									Items	Control	0.02	0.04	0.06	0.08
									Ingredients, %
									Timothy	30	30	30	30	30
									Beet pulp	10	10	10	10	10
									Corn	40	38.2	36.4	34.6	32.8
									SSBP	0	2	4	6	8
									Soybean meal	20	19.8	19.6	19.4	19.2
									Chemical composition
									CP, %DM	16.82	16.82	16.82	16.82	16.82
									EE, %DM	2.78	3.15	3.52	3.89	4.26
									NDF, %DM	55.72	55.45	55.18	54.92	54.65
									ADF, %DM	25.61	26.08	26.56	27.03	27.51
									Ash, %DM	4.99	5.48	5.98	6.48	6.97
									GE, kcal/kg	4438	4428	4418	4408	4399
								pH
								B-0-1	6.9	6.9	B-2-1	7.07	7.05667	B-4-1	7.17	7.19667	B-8-1	7.05	7.08667	B-16-1	7.14	7.09333	B-24-1	7	7.02333	7.16
								B-0-2	6.9		B-2-2	7.05		B-4-2	7.22		B-8-2	7.13		B-16-2	7.09		B-24-2	7.02		7.06
								B-0-3	6.9		B-2-3	7.05		B-4-3	7.2		B-8-3	7.08		B-16-3	7.05		B-24-3	7.05		7.03
								0-0-1	6.9	6.9	0-2-1	6.97	6.99	0-4-1	7	6.96333	0-8-1	6.8	6.76333	0-16-1	6.59	6.58667	0-24-1	6.56	6.54667	6.54
								0-0-2	6.9		0-2-2	6.94		0-4-2	6.98		0-8-2	6.76		0-16-2	6.59		0-24-2	6.53		6.47
								0-0-3	6.9		0-2-3	7.06		0-4-3	6.91		0-8-3	6.73		0-16-3	6.58		0-24-3	6.55		6.5
								2-0-1	6.9	6.9	2-2-1	7.05	7.06	2-4-1	.6.94	6.97	2-8-1	6.84	6.82667	2-16-1	6.59	6.60333	2-24-1	6.53	6.51667	6.47
								2-0-2	6.9		2-2-2	7.03		2-4-2	6.95		2-8-2	6.81		2-16-2	6.64		2-24-2	6.5		6.43
								2-0-3	6.9		2-2-3	7.1		2-4-3	6.99		2-8-3	6.83		2-16-3	6.58		2-24-3	6.52		6.42
								4-0-1	6.9	6.9	4-2-1	7.04	7.03	4-4-1	7.07	7.00333	4-8-1	6.76	6.75	4-16-1	6.66	6.63667	4-24-1	6.57	6.58	6.46
								4-0-2	6.9		4-2-2	7.08		4-4-2	6.96		4-8-2	6.73		4-16-2	6.62		4-24-2	6.63		6.48
								4-0-3	6.9		4-2-3	6.97		4-4-3	6.98		4-8-3	6.76		4-16-3	6.63		4-24-3	6.54		6.46
								6-0-1	6.9	6.9	6-2-1	7.03	7.00333	6-4-1	7	6.97	6-8-1	6.8	6.8	6-16-1	6.68	6.65	6-24-1	6.6	6.55667	6.41
								6-0-2	6.9		6-2-2	6.98		6-4-2	6.89		6-8-2	6.77		6-16-2	6.65		6-24-2	6.55		6.4
								6-0-3	6.9		6-2-3	7		6-4-3	7.02		6-8-3	6.83		6-16-3	6.62		6-24-3	6.52		6.45
								8-0-1	6.9	6.9	8-2-1	7.04	7.02	8-4-1	6.92	6.90667	8-8-1	6.8	6.77667	8-16-1	6.59	6.62667	8-24-1	6.56	6.55	6.47
								8-0-2	6.9		8-2-2	7.06		8-4-2	6.9		8-8-2	6.75		8-16-2	6.65		8-24-2	6.57		6.45
								8-0-3	6.9		8-2-3	6.96		8-4-3	6.9		8-8-3	6.78		8-16-3	6.64		8-24-3	6.52		6.43
																												One-slope broken line						Quadratic broken-line					Quadratic
																												dm'output;clear;log;clear';						dm'output;clear;log;clear';					dm'output;clear;log;clear';
									Time	0	2	4	8	16	24	48												Data BGK1302;						Data BGK1302;					Data BGK1302;
									Blank	6.9	7.06	7.2	7.09	7.09	7.02	7.08												input x y;						input x y;					input x y;
									0%	6.9	6.99	6.96	6.76	6.59	6.55	6.5												datalines;						datalines;					datalines;
									2%	6.9	7.06	6.97	6.83	6.6	6.52	6.44												0	98					0	98				0	98
									4%	6.9	7.03	7	6.75	6.64	6.58	6.47												0	94					0	94				0	94
									6%	6.9	7	6.97	6.8	6.65	6.56	6.42												0	98					0	98				0	98
									8%	6.9	7.02	6.91	6.78	6.63	6.55	6.45												2	100					2	100				2	100
																												2	94					2	94				2	94
																												2	98					2	98				2	98
																												4	82					4	82				4	82
																												4	80					4	80				4	80
																												4	76					4	76				4	76
																												8	80					8	80				8	80
																												8	84					8	84				8	84
																												8	80					8	80				8	80
																												10	81					10	81				10	81
																												10	84					10	84				10	84
																												10	80					10	80				10	80
																												;						;					;
																												data fill;						data fill;					data fill;
								Gas production																				do x=1.17 to 1.63 by 0.001; y=.;output; end;						do x=1.17 to 1.63 by 0.001; y=.;output; end;					do x=1.17 to 1.63 by 0.001; y=.;output; end;
								B-0-1	0	0	B-2-1	11	9.33333	B-4-1	9	11	B-8-1	10	9.33333	B-16-1	8	6.66667	B-24-1	4	4.33333	6		run;						run;					run;
								B-0-2	0		B-2-2	8		B-4-2	12		B-8-2	10		B-16-2	8		B-24-2	5		4		data BGK1302; set BGK1302 fill; run;						data BGK1302; set BGK1302 fill; run;					data BGK1302; set BGK1302 fill; run;
								B-0-3	0		B-2-3	9		B-4-3	12		B-8-3	8		B-16-3	4		B-24-3	4		5		proc sort data=BGK1302; by x;						proc sort data=BGK1302; by x;					proc sort data=BGK1302; by x;
								0-0-1	0	0	0-2-1	12	13	0-4-1	22	20.3333	0-8-1	36	36	0-16-1	66	64.6667	0-24-1	70	69.6667	98		ods html body='temp.xls';						ods html body='temp.xls';					ods html body='temp.xls';
								0-0-2	0		0-2-2	12		0-4-2	22		0-8-2	36		0-16-2	58		0-24-2	73		94		proc nlin data=BGK1302;						proc nlin data=BGK1302;					proc nlin data=BGK1302;
								0-0-3	0		0-2-3	15		0-4-3	17		0-8-3	36		0-16-3	70		0-24-3	66		98		parameters L=0.787 U=-0.3121 R=1.395;						parameters L=0.84 V=-1 R=2;					parameters L=0.84 V=-0.333 R=2;
								2-0-1	0	0	2-2-1	12	12.3333	2-4-1	20	21	2-8-1	33	31.6667	2-16-1	68	67.3333	2-24-1	67	65	100		bounds 1.35<R<1.44;						z1=(x<R)*(R-x);
								2-0-2	0		2-2-2	13		2-4-2	22		2-8-2	30		2-16-2	68		2-24-2	66		94		if (x le R) then model y = L + U*(R-x);						model y = L + V*(z1)*(z1);
								2-0-3	0		2-2-3	12		2-4-3	21		2-8-3	32		2-16-3	66		2-24-3	62		98		else model y = L +U*0;											model y = L + V*(R-x)*(R-x);
								4-0-1	0	0	4-2-1	13	11.3333	4-4-1	21	21.3333	4-8-1	31	29.6667	4-16-1	50	56	4-24-1	70	68.6667	82		output out=ppp p=predy;						output out=ppp p=predy;					output out=ppp p=predy;
								4-0-2	0		4-2-2	10		4-4-2	22		4-8-2	30		4-16-2	54		4-24-2	62		80		run;						run;					run;
								4-0-3	0		4-2-3	11		4-4-3	21		4-8-3	28		4-16-3	64		4-24-3	74		76		proc gplot;						proc gplot;					proc gplot;
								6-0-1	0	0	6-2-1	10	10.6667	6-4-1	22	20	6-8-1	29	26.3333	6-16-1	48	54	6-24-1	68	67.3333	80		title2 'one-slope broken-line';						title2 'quadratic broken-line';					title2 'quadratic';
								6-0-2	0		6-2-2	11		6-4-2	17		6-8-2	26		6-16-2	56		6-24-2	66		84		goptions hpos=35 vpos=35 ftext=swiss;						goptions hpos=35 vpos=35 ftext=swiss;					goptions hpos=35 vpos=35 ftext=swiss;
								6-0-3	0		6-2-3	11		6-4-3	21		6-8-3	24		6-16-3	58		6-24-3	68		80		symbol1 v=dot c=black;						symbol1 v=dot c=black;					symbol1 v=dot c=black;
								8-0-1	0	0	8-2-1	11	9	8-4-1	18	17.3333	8-8-1	22	22.3333	8-16-1	54	52	8-24-1	64	63.3333	81		symbol2 i=join v=none c=black;						symbol2 i=join v=none c=black;					symbol2 i=join v=none c=black;
								8-0-2	0		8-2-2	11		8-4-2	16		8-8-2	23		8-16-2	50		8-24-2	60		84		plot y*x predy*x/overlay;						plot y*x predy*x/overlay;					plot y*x predy*x/overlay;
								8-0-3	0		8-2-3	5		8-4-3	18		8-8-3	22		8-16-3	52		8-24-3	66		80		run;						run;					run;
																												ods html close;						ods html close;					ods html close;
																												quit;						quit;					quit;
								Time	0	2	4	8	16	24	48
								Blank	0	9.33	11	9.33	6.67	4.33	5
								0%	0	13	20.33	36	64.67	69.67	96.67																										Ovserved			Predicted
								2%	0	12.33	21	31.67	67.33	65	97.33																			0	98	0	96.6667	2.3094		0	96.6667	2.3094		96.9999		a	96.9999		R2
								4%	0	11.33	21.33	29.67	56	68.67	79.33																			0	94					2	97.3333	3.05505		96.9999		b	34.9
								6%	0	10.67	20	26.33	54	67.33	81.33																			0	98					4	79.3333	3.05505		80.7778		c	3.8
								8%	0	9	17.33	22.33	52	63.33	81.67																			2	100	2	97.3333	3.05505		8	81.3333	2.3094		80.7778		d	80.7778
																																		2	94					10	81.6667	2.08167		80.7778		m	10
																																		2	98
																																		4	82	4	79.3333	3.05505						3.40741			y= d + (a - d)/(1+(x/c)^b)^m
																																		4	80
																																		4	76					0				96.9999			fi
																																		8	80	8	81.3333	2.3094		1				96.9999
																																		8	84					2				96.9999
																																		8	80					3				96.9576
																																		10	81	10	81.6667	2.08167		4				80.7778
																																		10	84					5				80.7778
																																		10	80					6				80.7778
																																								7				80.7778
																																								8				80.7778
								Total VFA									Acetate																							9				80.7778
									0	2	4	8	16	24	48			0	2	4	8	16	24	48		0	4	16	24	48										10				80.7778
								Control	22.2575	22.466	29.8907	41.0188	61.6933	66.8448	82.3094		Control	13.2068	13.3832	17.6418	23.385	33.6545	35.6387	43.1325		5.47264	7.68892	18.5978	20.5691	25.1219
								0.02	22.2575	22.9951	30.9369	41.6099	62.0803	69.7643	81.0694		0.02	13.2068	13.6688	18.1553	23.7399	33.2865	36.2212	41.9775		5.47264	7.98709	18.5765	22.3207	25.2999
								0.04	22.2575	22.4267	30.6273	43.667	60.8346	67.4613	87.8109		0.04	13.2068	13.2171	17.9091	24.6231	32.2109	35.5977	45.0201		5.47264	7.85385	19.0702	21.4153	28.2397
								0.06	22.2575	23.0652	31.8873	41.8018	57.5655	68.1824	84.1299		0.06	13.2068	13.714	18.6848	23.2973	30.528	35.4834	43.1505		5.47264	8.32	18.2231	22.4436	27.9117
								0.08	22.2575	24.0543	30.5267	40.8793	57.284	67.1834	86.2789		0.08	13.2068	14.2539	17.7278	22.7356	29.985	34.5537	43.5865		5.47264	8.0392	18.7581	22.8037	29.0221
																																									y = 0.3178x2 - 4.9094x + 99.137
																																									R² = 0.7479
								A/P ratio
									0	2	4	8	16	24	48
								Control	2.41953	2.33859	2.29635	2.06461	1.80984	1.73472	1.71936
								0.02	2.41953	2.36159	2.27516	2.07682	1.79134	1.62694	1.65945
								0.04	2.41953	2.34202	2.28143	1.9497	1.69628	1.6641	1.59947
								0.06	2.41953	2.34988	2.27179	1.93793	1.67591	1.58312	1.54538
								0.08	2.41953	2.32482	2.20536	1.88643	1.59885	1.51534	1.50246
								NH3-N
								B-0-1	0.0973333	0.0973333	B-2-1	0.096	0.0963333	B-4-1	0.116	0.120667	B-8-1	0.149	0.147	B-16-1	0.17	0.163	B-24-1	0.17	0.185667	0.227
								B-0-2	0.0973333		B-2-2	0.096		B-4-2	0.132		B-8-2	0.145		B-16-2	0.159		B-24-2	0.201		0.209
								B-0-3	0.0973333		B-2-3	0.097		B-4-3	0.114		B-8-3	0.147		B-16-3	0.16		B-24-3	0.186		0.226
								0-0-1	0.0973333	0.0973333	0-2-1	0.116	0.116333	0-4-1	0.102	0.101	0-8-1	0.109	0.107333	0-16-1	0.107	0.110667	0-24-1	0.203	0.209667	0.225
								0-0-2	0.0973333		0-2-2	0.118		0-4-2	0.1		0-8-2	0.106		0-16-2	0.114		0-24-2	0.212		0.254
								0-0-3	0.0973333		0-2-3	0.115		0-4-3	0.101		0-8-3	0.107		0-16-3	0.111		0-24-3	0.214		0.277
								2-0-1	0.0973333	0.0973333	2-2-1	0.12	0.121333	2-4-1	0.097	0.0983333	2-8-1	0.098	0.1	2-16-1	0.109	0.107667	2-24-1	0.201	0.207667	0.247
								2-0-2	0.0973333		2-2-2	0.121		2-4-2	0.099		2-8-2	0.099		2-16-2	0.106		2-24-2	0.208		0.253
								2-0-3	0.0973333		2-2-3	0.123		2-4-3	0.099		2-8-3	0.103		2-16-3	0.108		2-24-3	0.214		0.25
								4-0-1	0.0973333	0.0973333	4-2-1	0.123	0.121333	4-4-1	0.095	0.0983333	4-8-1	0.101	0.0966667	4-16-1	0.101	0.107667	4-24-1	0.182	0.189667	0.261
								4-0-2	0.0973333		4-2-2	0.12		4-4-2	0.099		4-8-2	0.094		4-16-2	0.113		4-24-2	0.179		0.232
								4-0-3	0.0973333		4-2-3	0.121		4-4-3	0.101		4-8-3	0.095		4-16-3	0.109		4-24-3	0.208		0.242
								6-0-1	0.0973333	0.0973333	6-2-1	0.105	0.104333	6-4-1	0.093	0.094	6-8-1	0.101	0.0966667	6-16-1	0.102	0.101333	6-24-1	0.142	0.144667	0.235
								6-0-2	0.0973333		6-2-2	0.104		6-4-2	0.094		6-8-2	0.092		6-16-2	0.101		6-24-2	0.135		0.222
								6-0-3	0.0973333		6-2-3	0.104		6-4-3	0.095		6-8-3	0.097		6-16-3	0.101		6-24-3	0.157		0.252
								8-0-1	0.0973333	0.0973333	8-2-1	0.097	0.1	8-4-1	0.091	0.094	8-8-1	0.107	0.095	8-16-1	0.103	0.102333	8-24-1	0.149	0.149	0.239
								8-0-2	0.0973333		8-2-2	0.105		8-4-2	0.092		8-8-2	0.092		8-16-2	0.1		8-24-2	0.153		0.243
								8-0-3	0.0973333		8-2-3	0.098		8-4-3	0.099		8-8-3	0.086		8-16-3	0.104		8-24-3	0.145		0.256
								Time	0	3	6	12	24	48	72
								Blank	0.502341	0.470413	1.24734	2.08812	2.59898	3.32269	4.44019
								0%	0.502341	1.10898	0.619413	0.821626	0.928054	4.08897	5.44061
								2%	0.502341	1.26862	0.53427	0.587484	0.832269	4.02512	5.37676
								4%	0.502341	1.26862	0.53427	0.481056	0.832269	3.4504	5.21711
								6%	0.502341	0.725841	0.395913	0.481056	0.630055	2.01362	4.9404
								8%	0.502341	0.587484	0.395913	0.427842	0.661984	2.15198	5.24904
								std
								0	0.043	10	3.143		0.098
								0	0.043	10	3.002		0.094
								0	0.043	10	3.492		0.1											std
								2.5	0.994															0	0.043
								2.5	0.924															0	0.043
								2.5	0.898				0.0973333											0	0.043		0.043
								5	1.587															2.5	0.994		0.938667
								5	1.582															2.5	0.924		1.609
								5	1.658															2.5	0.898		3.21233
																								5	1.587
																								5	1.582
																								5	1.658
																								10	3.143
																								10	3.002
																								10	3.492
								B-0-1	0.502341	0.502341	B-2-1	0.45977	0.470413	B-4-1	1.09834	1.24734	B-8-1	2.15198	2.08812	B-16-1	2.82248	2.59898	B-24-1	2.82248	3.32269	4.6424
								B-0-2	0.502341		B-2-2	0.45977		B-4-2	1.6092		B-8-2	2.02427		B-16-2	2.47126		B-24-2	3.81226		4.06769
								B-0-3	0.502341		B-2-3	0.491699		B-4-3	1.03448		B-8-3	2.08812		B-16-3	2.50319		B-24-3	3.33333		4.61047
								0-0-1	0.502341	0.502341	0-2-1	1.09834	1.10898	0-4-1	0.651341	0.619413	0-8-1	0.87484	0.821626	0-16-1	0.810983	0.928054	0-24-1	3.87612	4.08897	4.57854
								0-0-2	0.502341		0-2-2	1.1622		0-4-2	0.587484		0-8-2	0.779055		0-16-2	1.03448		0-24-2	4.16347		5.50447
								0-0-3	0.502341		0-2-3	1.06641		0-4-3	0.619413		0-8-3	0.810983		0-16-3	0.938697		0-24-3	4.22733		6.23883
								2-0-1	0.502341	0.502341	2-2-1	1.22605	1.26862	2-4-1	0.491699	0.53427	2-8-1	0.523627	0.587484	2-16-1	0.87484	0.832269	2-24-1	3.81226	4.02512	5.28097
								2-0-2	0.502341		2-2-2	1.25798		2-4-2	0.555556		2-8-2	0.555556		2-16-2	0.779055		2-24-2	4.03576		5.47254
								2-0-3	0.502341		2-2-3	1.32184		2-4-3	0.555556		2-8-3	0.683269		2-16-3	0.842912		2-24-3	4.22733		5.37676
								4-0-1	0.502341	0.502341	4-2-1	1.32184	1.26862	4-4-1	0.427842	0.53427	4-8-1	0.619413	0.481056	4-16-1	0.619413	0.832269	4-24-1	3.20562	3.4504	5.72797
								4-0-2	0.502341		4-2-2	1.22605		4-4-2	0.555556		4-8-2	0.395913		4-16-2	1.00255		4-24-2	3.10983		4.80204
								4-0-3	0.502341		4-2-3	1.25798		4-4-3	0.619413		4-8-3	0.427842		4-16-3	0.87484		4-24-3	4.03576		5.12133
								6-0-1	0.502341	0.502341	6-2-1	0.747126	0.725841	6-4-1	0.363985	0.395913	6-8-1	0.619413	0.481056	6-16-1	0.651341	0.630055	6-24-1	1.92848	2.01362	4.89783
								6-0-2	0.502341		6-2-2	0.715198		6-4-2	0.395913		6-8-2	0.332056		6-16-2	0.619413		6-24-2	1.70498		4.48276
								6-0-3	0.502341		6-2-3	0.715198		6-4-3	0.427842		6-8-3	0.491699		6-16-3	0.619413		6-24-3	2.40741		5.44061
								8-0-1	0.502341	0.502341	8-2-1	0.491699	0.587484	8-4-1	0.300128	0.395913	8-8-1	0.810983	0.427842	8-16-1	0.683269	0.661984	8-24-1	2.15198	2.15198	5.02554
								8-0-2	0.502341		8-2-2	0.747126		8-4-2	0.332056		8-8-2	0.332056		8-16-2	0.587484		8-24-2	2.27969		5.15326
								8-0-3	0.502341		8-2-3	0.523627		8-4-3	0.555556		8-8-3	0.140485		8-16-3	0.715198		8-24-3	2.02427		5.56833
								Time	0	3	6	12	24	48	72			시간	0	3	6	12	24	48	72
								Blank	0.0973333	0.0963333	0.120667	0.147	0.163	0.185667	0.220667			Blank	0.0502341	0.0470413	0.124734	0.208812	0.259898	0.332269	0.444019
								0%	0.0973333	0.116333	0.101	0.107333	0.110667	0.209667	0.252			0%	0.0502341	0.110898	0.0619413	0.0821626	0.0928054	0.408897	0.544061
								2%	0.0973333	0.121333	0.0983333	0.1	0.107667	0.207667	0.25			2%	0.0502341	0.126862	0.053427	0.0587484	0.0832269	0.402512	0.537676
								4%	0.0973333	0.121333	0.0983333	0.0966667	0.107667	0.189667	0.245			4%	0.0502341	0.126862	0.053427	0.0481056	0.0832269	0.34504	0.521711
								6%	0.0973333	0.104333	0.094	0.0966667	0.101333	0.144667	0.236333			6%	0.0502341	0.0725841	0.0395913	0.0481056	0.0630055	0.201362	0.49404
								8%	0.0973333	0.1	0.094	0.095	0.102333	0.149	0.246			8%	0.0502341	0.0587484	0.0395913	0.0427842	0.0661984	0.215198	0.524904
																		시간	0	3	6	12	24	48	72
																		Blank	0.502341	0.470413	1.24734	2.08812	2.59898	3.32269	4.44019
																		0%	0.502341	1.10898	0.619413	0.821626	0.928054	4.08897	5.44061
																		2%	0.502341	1.26862	0.53427	0.587484	0.832269	4.02512	5.37676
																		4%	0.502341	1.26862	0.53427	0.481056	0.832269	3.4504	5.21711
																		6%	0.502341	0.725841	0.395913	0.481056	0.630055	2.01362	4.9404
																		8%	0.502341	0.587484	0.395913	0.427842	0.661984	2.15198	5.24904
								B-0-1	0.0973333	B-3-1	0.096	B-6-1	0.116	B-12-1	0.149	B-24-1	0.17	B-48-1	0.17	B-72-1	0.227
								B-0-2	0.0973333	B-3-2	0.096	B-6-2	0.132	B-12-2	0.145	B-24-2	0.159	B-48-2	0.201	B-72-2	0.209
								B-0-3	0.0973333	B-3-3	0.097	B-6-3	0.114	B-12-3	0.147	B-24-3	0.16	B-48-3	0.186	B-72-3	0.226
									0.0973333		0.0963333		0.120667		0.147		0.163		0.185667		0.220667
								0-0-1	0.0973333	=(E75-0.08+C52:C5316)/0.3+A48:N71132	0.116	0-6-1	0.102	0-12-1	0.109	0-24-1	0.107	0-48-1	0.203	0-72-1	0.225
								0-0-2	0.0973333	0-3-2	0.118	0-6-2	0.1	0-12-2	0.106	0-24-2	0.114	0-48-2	0.212	0-72-2	0.254
								0-0-3	0.0973333	0-3-3	0.115	0-6-3	0.101	0-12-3	0.107	0-24-3	0.111	0-48-3	0.214	0-72-3	0.277
									0.0973333		0.116333		0.101		0.107333		0.110667		0.209667		0.252
								2-0-1	0.0973333	2-3-1	0.12	2-6-1	0.097	2-12-1	0.098	2-24-1	0.109	2-48-1	0.201	2-72-1	0.247
								2-0-2	0.0973333	2-3-2	0.121	2-6-2	0.099	2-12-2	0.099	2-24-2	0.106	2-48-2	0.208	2-72-2	0.253
								2-0-3	0.0973333	2-3-3	0.123	2-6-3	0.099	2-12-3	0.103	2-24-3	0.108	2-48-3	0.214	2-72-3	0.25
									0.0973333		0.121333		0.0983333		0.1		0.107667		0.207667		0.25
								4-0-1	0.0973333	4-3-1	0.123	4-6-1	0.095	4-12-1	0.101	4-24-1	0.101	4-48-1	0.182	4-72-1	0.261
								4-0-2	0.0973333	4-3-2	0.12	4-6-2	0.099	4-12-2	0.094	4-24-2	0.113	4-48-2	0.179	4-72-2	0.232
								4-0-3	0.0973333	4-3-3	0.121	4-6-3	0.101	4-12-3	0.095	4-24-3	0.109	4-48-3	0.208	4-72-3	0.242
									0.0973333		0.121333		0.0983333		0.0966667		0.107667		0.189667		0.245
								6-0-1	0.0973333	6-3-1	0.105	6-6-1	0.093	6-12-1	0.101	6-24-1	0.102	6-48-1	0.142	6-72-1	0.235
								6-0-2	0.0973333	6-3-2	0.104	6-6-2	0.094	6-12-2	0.092	6-24-2	0.101	6-48-2	0.135	6-72-2	0.222
								6-0-3	0.0973333	6-3-3	0.104	6-6-3	0.095	6-12-3	0.097	6-24-3	0.101	6-48-3	0.157	6-72-3	0.252
									0.0973333		0.104333		0.094		0.0966667		0.101333		0.144667		0.236333
								8-0-1	0.0973333	8-3-1	0.097	8-6-1	0.091	8-12-1	0.107	8-24-1	0.103	8-48-1	0.149	8-72-1	0.239
								8-0-2	0.0973333	8-3-2	0.105	8-6-2	0.092	8-12-2	0.092	8-24-2	0.1	8-48-2	0.153	8-72-2	0.243
								8-0-3	0.0973333	8-3-3	0.098	8-6-3	0.099	8-12-3	0.086	8-24-3	0.104	8-48-3	0.145	8-72-3	0.256
									0.0973333		0.1		0.094		0.095		0.102333		0.149		0.246
								Time
									0	2	4	8	16	24	48
								Control	0.502341	1.10898	0.619413	0.821626	0.928054	4.08897	5.44061
								2%	0.502341	1.26862	0.53427	0.587484	0.832269	4.02512	5.37676
								4%	0.502341	1.26862	0.53427	0.481056	0.832269	3.4504	5.21711
								6%	0.502341	0.725841	0.395913	0.481056	0.630055	2.01362	4.9404
								8%	0.502341	0.587484	0.395913	0.427842	0.661984	2.15198	5.24904
[truncated: 1 more columns]

## Sheet: 4-1. Milk yield
Pen	Cow number	Additional number	Milk yield	8/25	8/26	8/27	8/28	8/29 (Start)	8/30 (1 d)	8/31	9/1	9/2	9/3	9/4	9/5	9/6	9/7	9/8	9/9	9/10	9/11	9/12	9/13	9/14	9/15	9/16	9/17	9/18	9/19	9/20	9/21	9/22	9/23	9/24	9/25	9/26	9/27	9/28
1 (CON)	1174	unknown		26.3	27.3	26	26.3	28.2	26.2	27.5	26	27.5	26.5	25.5	25.6	25.2	27.6	27.8	26.6	27.1	27.7	25.8	27.3	27.2	26.6	26	26.6	26	26.6	23.4	25.1	26	25.2	26.6	26.8	26.5	27.8	26.6
	1271	80		29.5	27.2	30.8	29.8	30.5	31.6	32.1	32	34.1	32.3	31.5	31.1	29.6	32	32.8	31.5	32.1	32	31.8	33.1	29.4	33.8	32	31.7	30.7	32.5	30.6	32.6	32.4	32.8	34.2	34.4	35.1	35.2	33.8
	1209	16		35.1	33.7	27.9	34.4	35.6	36	36.1	37.1	37.9	39.1	35.6	36.8	33.8	37.7	37.1	36.6	36	35.2	37.4	36.3	37.4	33.7	35.5	34.2
	1253	48		35.5	35.5	33.5	36.9	38.1	35.7	36.2	36.1	36.1	33.8	34.5	32.8	32.7	34.9	29.5	30.5	31.7	31.5	34.8	32.8	34.8	33.6	32.5	33.1	30	30.3	31.1	31.6	30.9	31	32.5	31.8	33.2	33.5	32.6
AVERAGE				31.6	30.925	29.55	31.85	33.1	32.375	32.975	32.8	33.9	32.925	31.775	31.575	30.325	33.05	31.8	31.3	31.725	31.6	32.45	32.375	32.2	31.925	31.5	31.4	28.9	29.8	28.3667	29.7667	29.7667	29.6667	31.1	31	31.6	32.1667	31
2 (CON)	1200	23		31.2	31.3	32	31.2	32	33	34.5	33.7	35	33.7	33.7	33	34.7	34.9	35.6	34.7	36.6	34.4	35.8	33.6	34.9	33.8	33.8	32.2	32.4	32.3
	1241	8		27.4	28.4	27.7	28.5	31.1	30.4	29.9	28.2	30.7	29.7	29.9	28.2	28.9	29	29.1	28.8	31.725	28.8	28	28.9	28.7	28.7	28.8	29.2	27.8	28.6	28.8	26.9	29.9	28.2	28.4	28.5	26.7	22.8	23.7
	1229	69		24.7	23.8	23.9	25.1	25.4	25.5	24.8	30.4	30.9	31.8	30.3	29.6	27.9	31.3	30	28.6	27.4	28.8	28.8	28.5	27.7	27	26.7	27.2	25.8	27.3	23	25.6	26.3	26.2	27.3	27.4
	1242	49		34.4	36.3	32.7	34.1	35.3	31.5	31.3	26.6	32.4	33.2	33.3	31.6	29.6	32.6	30	28.4	28.4	26.7	31.8	30	30.5	31.6	32.2	29.9	29.1	29.5	27.4	26.4	28	28.5	29.8	30.4	28.8	26.4	26
AVERAGE				29.425	29.95	29.075	29.725	30.95	30.1	30.125	29.725	32.25	32.1	31.8	30.6	30.275	31.95	31.175	30.125	31.0312	29.675	31.1	30.25	30.45	30.275	30.375	29.625	28.775	29.425	26.4	26.3	28.0667	27.6333	28.5	28.7667	27.75	24.6	24.85
3 (TREAT)	88	88		29.6	30.9	29.9	28.4	32.5	29.9	29.7	31.9	30.6	31.2	30.9	32.2	30.9	31.6	22.6	34	31.7	30	31.1	30	32.5	31.6	32.1	32.4	30.8	29	29.5	27.6	29.1	26	27.2	28.6	28.7	29.1	27.3
	1236	7		27.8	29.5	28.4	28.7	32.3	33	36.1	33.9	33.8	33.8	32.5	35.1	32.6	33.1	34.7	34.8	36.8	35	35.4	34.2	35.6	34.2	32.6	33.7	32.1	33.4	33.8	34.3	35.2	32.2	34.6	35.2	32.2	35.1	35.3
	1275	96		29.9	29.8	28.3	29.2	31.7	30.2	30.3	31.3	29.6	29.5	28.7	29.2	28	29.4	28.2	29.3	30	29.2	28.3	29.6	30.8	30.6	30.5	28.3	29.3	28.6	26.6	25.8	28.6	27.6	25.3	27.1	28.5	24.8	29.8
	1250	41		34	34.1	33	35.5	36.4	35.7	33	32.8	33.2	33.2	33.1	35.2	31.7	34.6	33.1	29.7	32.6	32.7	33.6	33.5	32.7	33.9	31.6	31.8	29.7	29.5	31.9	30.2	30.6	32.9	32.7	30.8	31.8	33.2	30.1
AVERAGE				30.325	31.075	29.9	30.45	33.225	32.2	32.275	32.475	31.8	31.925	31.3	32.925	30.8	32.175	30.65	31.95	32.775	31.725	32.1	31.825	32.9	32.575	31.7	31.55	30.475	30.125	30.45	29.475	30.875	29.675	29.95	30.425	30.3	30.55	30.625
4 (TREAT)	1255	77		29.2	32.4	30.2	31	29.5	31.4	32.7	30.8	32.9	31.7	31	31.9	29.6	34.6	32.6	29.8	30.7	32	32.3	31.2	33.9	31.2	30.2	31.3	27.8	29.4	26.6	28.4	28.7	24.5	29.7	27.6	29.8	32.7	31
	1349	53		29.7	31.3	31.2	29.9	33.9	33.2	33.4	31.6	32.1	30.8	32.8	31.4	30.1	32.3	28.5	28.7	29.8	30.6	29.9	28.2	28.3	31.9	31.1	30.6	27.8	31.3	31.4	29.7	29.1	28.3	30.2	29.6	30.1	32.5	29.4
	1225	51		31.4	32.6	32.9	32.3	36.4	33.5	35.2	36.8	34.9	35.4	33.3	33.8	33.5	34.6	33.3	30.9	29.9	31.2	31	32.7									30.8	30	32.1
	1184	70		29.7	32.4	30.3	32.5	32.1	31.2	32.1	30.7	31.9	32	31.2	29.5	25.5	29.7	29.8	28.7	28.3	27.5	26.9	26.3	26.9	27.7	27.1	28.3	25.7	28.4	27.4	27.4	27.8	26.3	27.1	27.4	26.8	27.8	26
AVERAGE				30	32.175	31.15	31.425	32.975	32.325	33.35	32.475	32.95	32.475	32.075	31.65	29.675	32.8	31.05	29.525	29.675	30.325	30.025	29.6	29.7	30.2667	29.4667	30.0667	27.1	29.7	28.4667	28.5	29.1	27.275	29.775	28.2	28.9	31	28.8
			con mean	30.5125	30.4375	29.3125	30.7875	32.025	31.2375	31.55	31.2625	33.075	32.5125	31.7875	31.0875	30.3	32.5	31.4875	30.7125	31.3781	30.6375	31.775	31.3125	31.325	31.1	30.9375	30.5125	28.8286	29.5857	27.3833	28.0333	28.9167	28.65	29.8	29.8833	30.06	29.14	28.54
			treat mean	30.1625	31.625	30.525	30.9375	33.1	32.2625	32.8125	32.475	32.375	32.2	31.6875	32.2875	30.2375	32.4875	30.9167	30.7375	31.225	31.025	31.0625	30.7125	31.5286	31.5857	30.7429	30.9143	29.0286	29.9429	29.6	29.0571	29.9875	28.475	29.8625	29.4714	29.7	30.7429	29.8429
			t-test	0.790646	0.388636	0.284167	0.912957	0.43868	0.415825	0.351377	0.376213	0.521207	0.78763	0.921993	0.311022	0.957348	0.991092	0.621909	0.983315	0.905331	0.72786	0.613297	0.614762	0.915791	0.691321	0.837771	0.704987	0.884479	0.688103	0.129529	0.448531	0.315204	0.888255	0.961891	0.720663	0.849905	0.39932	0.427768

## Sheet: 4-2. Feed intake
Pen	Cow number	Additional number	섭취량	2016-08-29	2016-08-30	2016-08-31	2016-09-01	2016-09-02	2016-09-03	2016-09-04	2016-09-05	2016-09-06	2016-09-07	2016-09-08	2016-09-09	2016-09-10	2016-09-11	2016-09-12	2016-09-13	2016-09-14	2016-09-15	2016-09-16	2016-09-17	2016-09-18	2016-09-19	2016-09-20	2016-09-21	2016-09-22	2016-09-23	2016-09-24	2016-09-25	2016-09-26	2016-09-27
1 (CON)	1253	48		43.75	37.5	37.5	37.5	37.5	37.5	40	40	40	40	40	40	40	40	40	40	40	40	40	40	42.6	43.36	40.38	41.5	43.06	43.8	44.8	45	44	43.8
	1174	79		43.75	37.5	37.5	37.5	37.5	37.5	40	40	40	40	40	40	40	40	40	40	40	40	40	40	42.73	43.68	45	41.62	44.6	43.7	44.5	45	43.6	43.48
	1271	80		43.75	37.5	37.5	37.5	37.5	37.5	40	40	40	40	40	40	40	40	40	40	40	40	40	40	39.37	41.44	44.27	38.58	42.44	42.3	42.7	45	43.8	43.77
	1209	16		43.75	37.5	37.5	37.5	37.5	37.5	40	40	40	40	40	40	40	40	40	40	40	40	40	40	44.47	44.46	41.57	44.32	44.72	43.86	44.5	45	43	44.58
2 (CON)	1229	69		42.5	37.5	37.5	37.5	37.5	37.5	40	40	40	40	39.75	40	40	40	40	40	40	40	40	40	44.46	43.79	43.72	43.56	44.46	44.16	44	44	44.5	44
	1241	8		42.5	37.5	37.5	37.5	37.5	37.5	40	40	40	40	39.75	40	40	40	40	40	40	40	40	40	44.56	43.36	35.42	43.7	44.3	43.9	43.8	45	44.7	45
	1200	23		42.5	37.5	37.5	37.5	37.5	37.5	40	40	40	40	39.75	40	40	40	40	40	40	40	40	40	39.79	40.79	34.5	37.54	44.7	44.7	45	45	44.8	45
	1242	49		42.5	37.5	37.5	37.5	37.5	37.5	40	40	40	40	39.75	40	40	40	40	40	40	40	40	40	39.36	34.87	25.8	27.58	43.59	41.96	43.7	45	43.7	45
3 (TREAT)	1236	7		45.75	37.5	37.5	37.5	37.5	37.5	40	40	40	40	39.5	40	40	40	40	40	40	40	40	40	37.58	38.58	45	36.98	37.64	40.38	41.7	38.7	39.7	40.7
	1250	41		45.75	37.5	37.5	37.5	37.5	37.5	40	40	40	40	39.5	40	40	40	40	40	40	40	40	40	38.13	38.76	45	33.34	42.02	39.34	39.79	39.56	41.79	40.85
	1275	96		45.75	37.5	37.5	37.5	37.5	37.5	40	40	40	40	39.5	40	40	40	40	40	40	40	40	40	44.29	44.25	45	44.5	44.6	42.2	44.47	45	44.6	44.33
	88	88		45.75	37.5	37.5	37.5	37.5	37.5	40	40	40	40	39.5	40	40	40	40	40	40	40	40	40	39.56	39.79	40.68	35.64	39.6	41.04	42.89	42.3	42.4	42.7
4 (TREAT)	1225	51		44	37.5	37.5	37.5	37.5	37.5	40	40	40	40	39.25	40	40	40	40	40	40	40	40	40	39.37	40.84	45	39.66	42.64	42.72	43.47	45	42.9	42.84
	1349	53		44	37.5	37.5	37.5	37.5	37.5	40	40	40	40	39.25	40	40	40	40	40	40	40	40	40	40.84	40.36	45	39.56	40.34	41.94	41.57	45	42.55	42.83
	1255	77		44	37.5	37.5	37.5	37.5	37.5	40	40	40	40	39.25	40	40	40	40	40	40	40	40	40	43.14	43.68	45	43.5	44.44	44.6	44.26	45	44	43.67
	1184	70		44	37.5	37.5	37.5	37.5	37.5	40	40	40	40	39.25	40	40	40	40	40	40	40	40	40	43.47	43.99	45	43.8	43.84	44.8	43.15	45	43.8	43.89
			con	43.125	37.5	37.5	37.5	37.5	37.5	40	40	40	40	39.875	40	40	40	40	40	40	40	40	40	42.1675	41.9688	38.8325	39.8	43.9838	43.5475	44.125	44.875	44.0125	44.3287
			treat	44.875	37.5	37.5	37.5	37.5	37.5	40	40	40	40	39.375	40	40	40	40	40	40	40	40	40	40.7975	41.2812	44.46	39.6225	41.89	42.1275	42.6625	43.195	42.7175	42.7263
			ttest	0.000904599																				0.282324	0.627565	0.0467997	0.94287	0.0534252	0.0882069	0.0379855	0.121472	0.0534277	0.0118946
				2016-08-29		2016-08-30		2016-08-31		2016-09-01		2016-09-02		2016-09-03		2016-09-04		2016-09-05		2016-09-06		2016-09-07		2016-09-08		2016-09-09		2016-09-10		2016-09-11		2016-09-12		2016-09-13		2016-09-14		2016-09-15		2016-09-16		2016-09-17		2016-09-18		2016-09-19		2016-09-20
Pen	Cow number	Additional number		INPUT	RESIDUE	INPUT	RESIDUE	INPUT	RESIDUE	INPUT	RESIDUE	INPUT	RESIDUE	INPUT	RESIDUE	INPUT	RESIDUE	INPUT	RESIDUE	INPUT	RESIDUE	INPUT	RESIDUE	INPUT	RESIDUE	INPUT	RESIDUE	INPUT	RESIDUE	INPUT	RESIDUE	INPUT	RESIDUE	INPUT	RESIDUE	INPUT	RESIDUE	INPUT	RESIDUE	INPUT	RESIDUE	INPUT	RESIDUE	INPUT	RESIDUE	INPUT	RESIDUE	INPUT	RESIDUE
1 (CON)	1253	48		50	6.25	37.5	0	37.5	0	37.5	0	37.5	0	37.5	0	40	0	40	0	40	0	40	0	40	0	40	0	40	0	40	0	40	0	40	0	40	0	40	0	40	0	40	0	45	2.4	45	1.64	45	4.62
	1174	79		50	6.25	37.5	0	37.5	0	37.5	0	37.5	0	37.5	0	40	0	40	0	40	0	40	0	40	0	40	0	40	0	40	0	40	0	40	0	40	0	40	0	40	0	40	0	45	2.27	45	1.32	45	0
	1271	80		50	6.25	37.5	0	37.5	0	37.5	0	37.5	0	37.5	0	40	0	40	0	40	0	40	0	40	0	40	0	40	0	40	0	40	0	40	0	40	0	40	0	40	0	40	0	45	5.63	45	3.56	45	0.73
	1209	16		50	6.25	37.5	0	37.5	0	37.5	0	37.5	0	37.5	0	40	0	40	0	40	0	40	0	40	0	40	0	40	0	40	0	40	0	40	0	40	0	40	0	40	0	40	0	45	0.53	45	0.54	45	3.43
2 (CON)	1229	69		50	7.5	37.5	0	37.5	0	37.5	0	37.5	0	37.5	0	40	0	40	0	40	0	40	0	40	0.25	40	0	40	0	40	0	40	0	40	0	40	0	40	0	40	0	40	0	45	0.54	45	1.21	45	1.28
	1241	8		50	7.5	37.5	0	37.5	0	37.5	0	37.5	0	37.5	0	40	0	40	0	40	0	40	0	40	0.25	40	0	40	0	40	0	40	0	40	0	40	0	40	0	40	0	40	0	45	0.44	45	1.64	45	9.58
	1200	23		50	7.5	37.5	0	37.5	0	37.5	0	37.5	0	37.5	0	40	0	40	0	40	0	40	0	40	0.25	40	0	40	0	40	0	40	0	40	0	40	0	40	0	40	0	40	0	45	5.21	45	4.21	45	10.5
	1242	49		50	7.5	37.5	0	37.5	0	37.5	0	37.5	0	37.5	0	40	0	40	0	40	0	40	0	40	0.25	40	0	40	0	40	0	40	0	40	0	40	0	40	0	40	0	40	0	45	5.64	45	10.13	45	19.2
3 (TREAT)	1236	7		50	4.25	37.5	0	37.5	0	37.5	0	37.5	0	37.5	0	40	0	40	0	40	0	40	0	40	0.5	40	0	40	0	40	0	40	0	40	0	40	0	40	0	40	0	40	0	45	7.42	45	6.42	45	0
	1250	41		50	4.25	37.5	0	37.5	0	37.5	0	37.5	0	37.5	0	40	0	40	0	40	0	40	0	40	0.5	40	0	40	0	40	0	40	0	40	0	40	0	40	0	40	0	40	0	45	6.87	45	6.24	45	0
	1275	96		50	4.25	37.5	0	37.5	0	37.5	0	37.5	0	37.5	0	40	0	40	0	40	0	40	0	40	0.5	40	0	40	0	40	0	40	0	40	0	40	0	40	0	40	0	40	0	45	0.71	45	0.75	45	0
	88	88		50	4.25	37.5	0	37.5	0	37.5	0	37.5	0	37.5	0	40	0	40	0	40	0	40	0	40	0.5	40	0	40	0	40	0	40	0	40	0	40	0	40	0	40	0	40	0	45	5.44	45	5.21	45	4.32
4 (TREAT)	1225	51		50	6	37.5	0	37.5	0	37.5	0	37.5	0	37.5	0	40	0	40	0	40	0	40	0	40	0.75	40	0	40	0	40	0	40	0	40	0	40	0	40	0	40	0	40	0	45	5.63	45	4.16	45	0
	1349	53		50	6	37.5	0	37.5	0	37.5	0	37.5	0	37.5	0	40	0	40	0	40	0	40	0	40	0.75	40	0	40	0	40	0	40	0	40	0	40	0	40	0	40	0	40	0	45	4.16	45	4.64	45	0
	1255	77		50	6	37.5	0	37.5	0	37.5	0	37.5	0	37.5	0	40	0	40	0	40	0	40	0	40	0.75	40	0	40	0	40	0	40	0	40	0	40	0	40	0	40	0	40	0	45	1.86	45	1.32	45	0
	1184	70		50	6	37.5	0	37.5	0	37.5	0	37.5	0	37.5	0	40	0	40	0	40	0	40	0	40	0.75	40	0	40	0	40	0	40	0	40	0	40	0	40	0	40	0	40	0	45	1.53	45	1.01	45	0
	2016-08-29	2016-08-30	2016-08-31	2016-09-01	2016-09-02	2016-09-03	2016-09-04	2016-09-05	2016-09-06	2016-09-07	2016-09-08	2016-09-09	2016-09-10	2016-09-11	2016-09-12	2016-09-13	2016-09-14	2016-09-15	2016-09-16	2016-09-17	2016-09-18	2016-09-19	2016-09-20	2016-09-21	2016-09-22	2016-09-23	2016-09-24	2016-09-25	2016-09-26	2016-09-27
Feed intake	43.75	37.5	37.5	37.5	37.5	37.5	40	40	40	40	40	40	40	40	40	40	40	40	40	40	42.6	43.36	40.38	41.5	43.06	43.8	44.8	45	44	43.8
	43.75	37.5	37.5	37.5	37.5	37.5	40	40	40	40	40	40	40	40	40	40	40	40	40	40	42.73	43.68	45	41.62	44.6	43.7	44.5	45	43.6	43.48
	43.75	37.5	37.5	37.5	37.5	37.5	40	40	40	40	40	40	40	40	40	40	40	40	40	40	39.37	41.44	44.27	38.58	42.44	42.3	42.7	45	43.8	43.77
	43.75	37.5	37.5	37.5	37.5	37.5	40	40	40	40	40	40	40	40	40	40	40	40	40	40	44.47	44.46	41.57	44.32	44.72	43.86	44.5	45	43	44.58
	42.5	37.5	37.5	37.5	37.5	37.5	40	40	40	40	39.75	40	40	40	40	40	40	40	40	40	44.46	43.79	43.72	43.56	44.46	44.16	44	44	44.5	44
	42.5	37.5	37.5	37.5	37.5	37.5	40	40	40	40	39.75	40	40	40	40	40	40	40	40	40	44.56	43.36	35.42	43.7	44.3	43.9	43.8	45	44.7	45
	42.5	37.5	37.5	37.5	37.5	37.5	40	40	40	40	39.75	40	40	40	40	40	40	40	40	40	39.79	40.79	34.5	37.54	44.7	44.7	45	45	44.8	45
	42.5	37.5	37.5	37.5	37.5	37.5	40	40	40	40	39.75	40	40	40	40	40	40	40	40	40	39.36	34.87	25.8	27.58	43.59	41.96	43.7	45	43.7	45
	45.75	37.5	37.5	37.5	37.5	37.5	40	40	40	40	39.5	40	40	40	40	40	40	40	40	40	37.58	38.58	45	36.98	37.64	40.38	41.7	38.7	39.7	40.7
	45.75	37.5	37.5	37.5	37.5	37.5	40	40	40	40	39.5	40	40	40	40	40	40	40	40	40	38.13	38.76	45	33.34	42.02	39.34	39.79	39.56	41.79	40.85
	45.75	37.5	37.5	37.5	37.5	37.5	40	40	40	40	39.5	40	40	40	40	40	40	40	40	40	44.29	44.25	45	44.5	44.6	42.2	44.47	45	44.6	44.33
	45.75	37.5	37.5	37.5	37.5	37.5	40	40	40	40	39.5	40	40	40	40	40	40	40	40	40	39.56	39.79	40.68	35.64	39.6	41.04	42.89	42.3	42.4	42.7
	44	37.5	37.5	37.5	37.5	37.5	40	40	40	40	39.25	40	40	40	40	40	40	40	40	40	39.37	40.84	45	39.66	42.64	42.72	43.47	45	42.9	42.84
	44	37.5	37.5	37.5	37.5	37.5	40	40	40	40	39.25	40	40	40	40	40	40	40	40	40	40.84	40.36	45	39.56	40.34	41.94	41.57	45	42.55	42.83
	44	37.5	37.5	37.5	37.5	37.5	40	40	40	40	39.25	40	40	40	40	40	40	40	40	40	43.14	43.68	45	43.5	44.44	44.6	44.26	45	44	43.67
	44	37.5	37.5	37.5	37.5	37.5	40	40	40	40	39.25	40	40	40	40	40	40	40	40	40	43.47	43.99	45	43.8	43.84	44.8	43.15	45	43.8	43.89
control	43.125	37.5	37.5	37.5	37.5	37.5	40	40	40	40	39.875	40	40	40	40	40	40	40	40	40	42.1675	41.9688	38.8325	39.8	43.9838	43.5475	44.125	44.875	44.0125	44.3287
treatment	44.875	37.5	37.5	37.5	37.5	37.5	40	40	40	40	39.375	40	40	40	40	40	40	40	40	40	40.7975	41.2812	44.46	39.6225	41.89	42.1275	42.6625	43.195	42.7175	42.7263
																					42.7641
																					42.148
																					0.438456
[truncated: 14 more columns]

[truncated: 7 more sheets: 4-3. Milk composition, 4-4. Blood composition, 4-5. Body weight, 4-6. Pen informantion, 4-7. Cow information, 4-8. Experimental feed formular, 4-9. Feed ingredient chem comp.]
